# Supplementary material for: Machine learning-based analysis identifies and validates serum exosomal proteomic signatures for the diagnosis of colorectal cancer
Source: PubMed Central journal article supplement — Cell Rep Med. 2024 Aug 20;5(8):101689. doi: 10.1016/j.xcrm.2024.101689 (PMC11384723; doi:10.1016/j.xcrm.2024.101689), 2024-08-20
Supplement: mmc1.pdf [file mmc1.pdf]

**Cell Reports Medicine, Volume 5**

**Supplemental information**

**Machine learning-based analysis identifies  
and validates serum exosomal proteomic signatures  
for the diagnosis of colorectal cancer**

**Haofan Yin, Jinye Xie, Shan Xing, Xiaofang Lu, Yu Yu, Yong Ren, Jian Tao, Guirong He, Lijun Zhang, Xiaopeng Yuan, Zheng Yang, and Zhijian Huang**

# 1 Supplementary materials

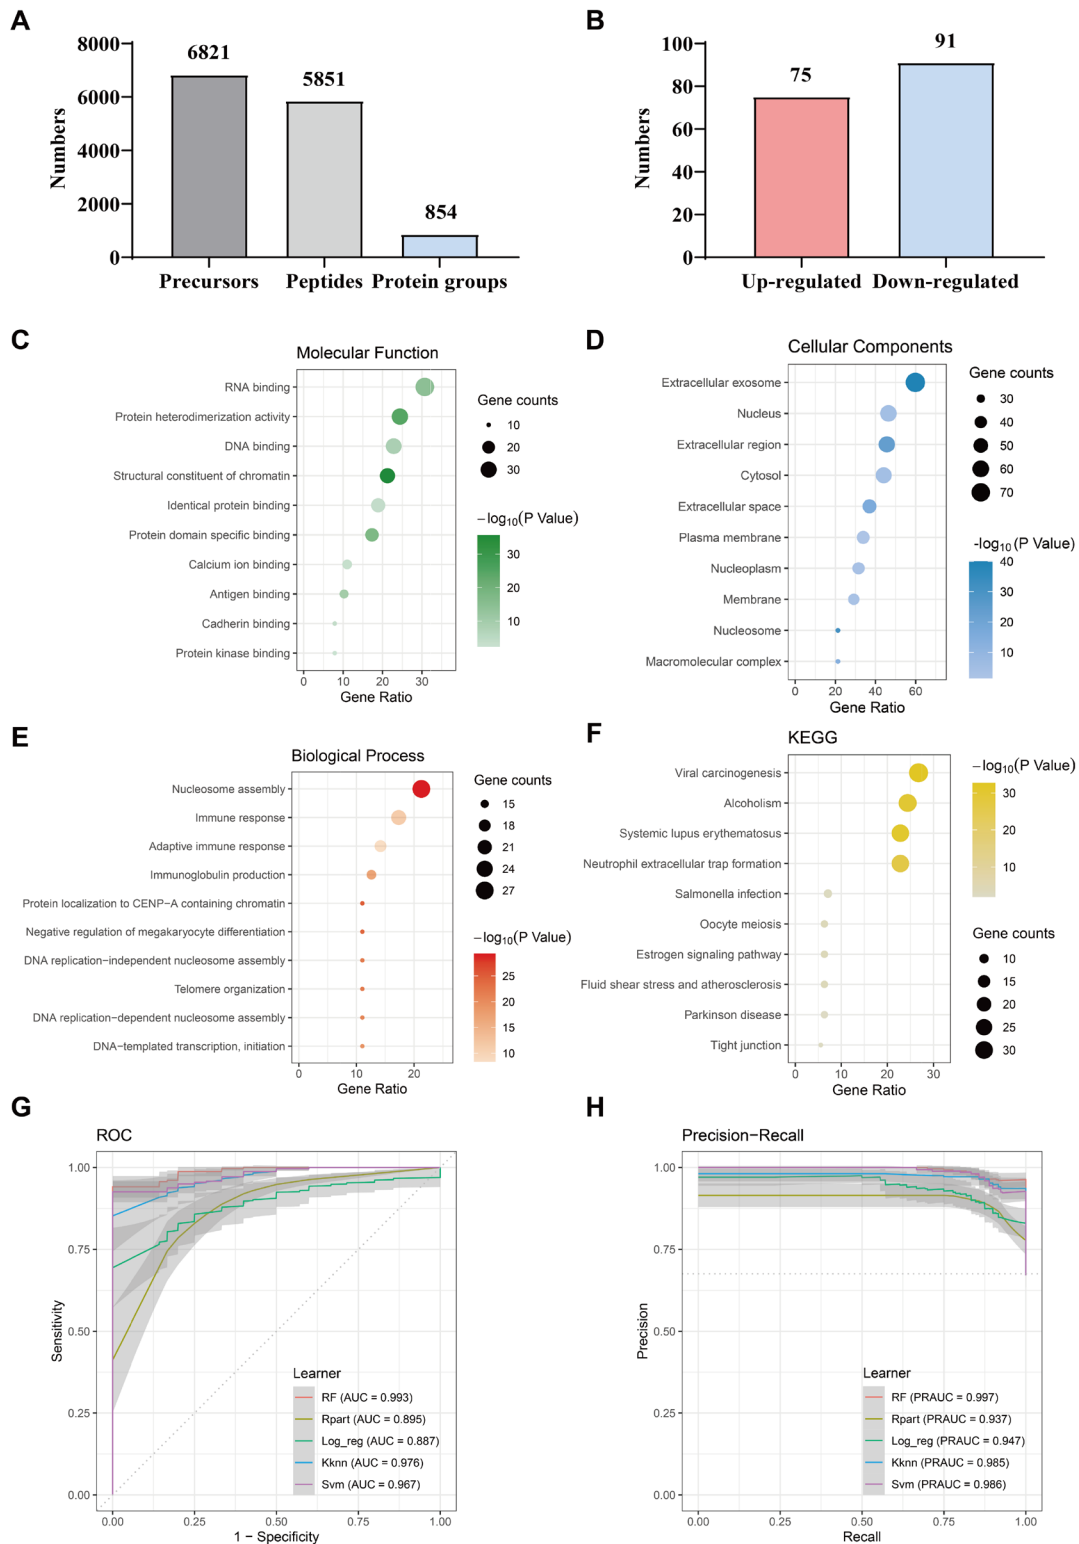

2

## 3 Figure S1 DEPs identification and functional enrichment analysis in serum EVs 4 based on 4D-DIA proteomics.

5 Number of precursors, peptides, and proteins from serum EVs identified by 4D-DIA  
6 proteomics in CRC patients and HC. (B) Number of up-regulated and down-regulated  
7 proteins in serum EVs of CRC. (C-F) Down-regulated proteins enrichment analysis

8 displayed the potential molecular function (C), cellular component (D), biological  
 9 process (E), and KEGG pathways (F) enriched in HC compared to CRC group. (G, H)  
 10 Diagnostic performance of ML models based on different algorithms. ROC (G) and PR  
 11 (H) curves of the indicated ML diagnostic models based on the 12 candidate proteins.

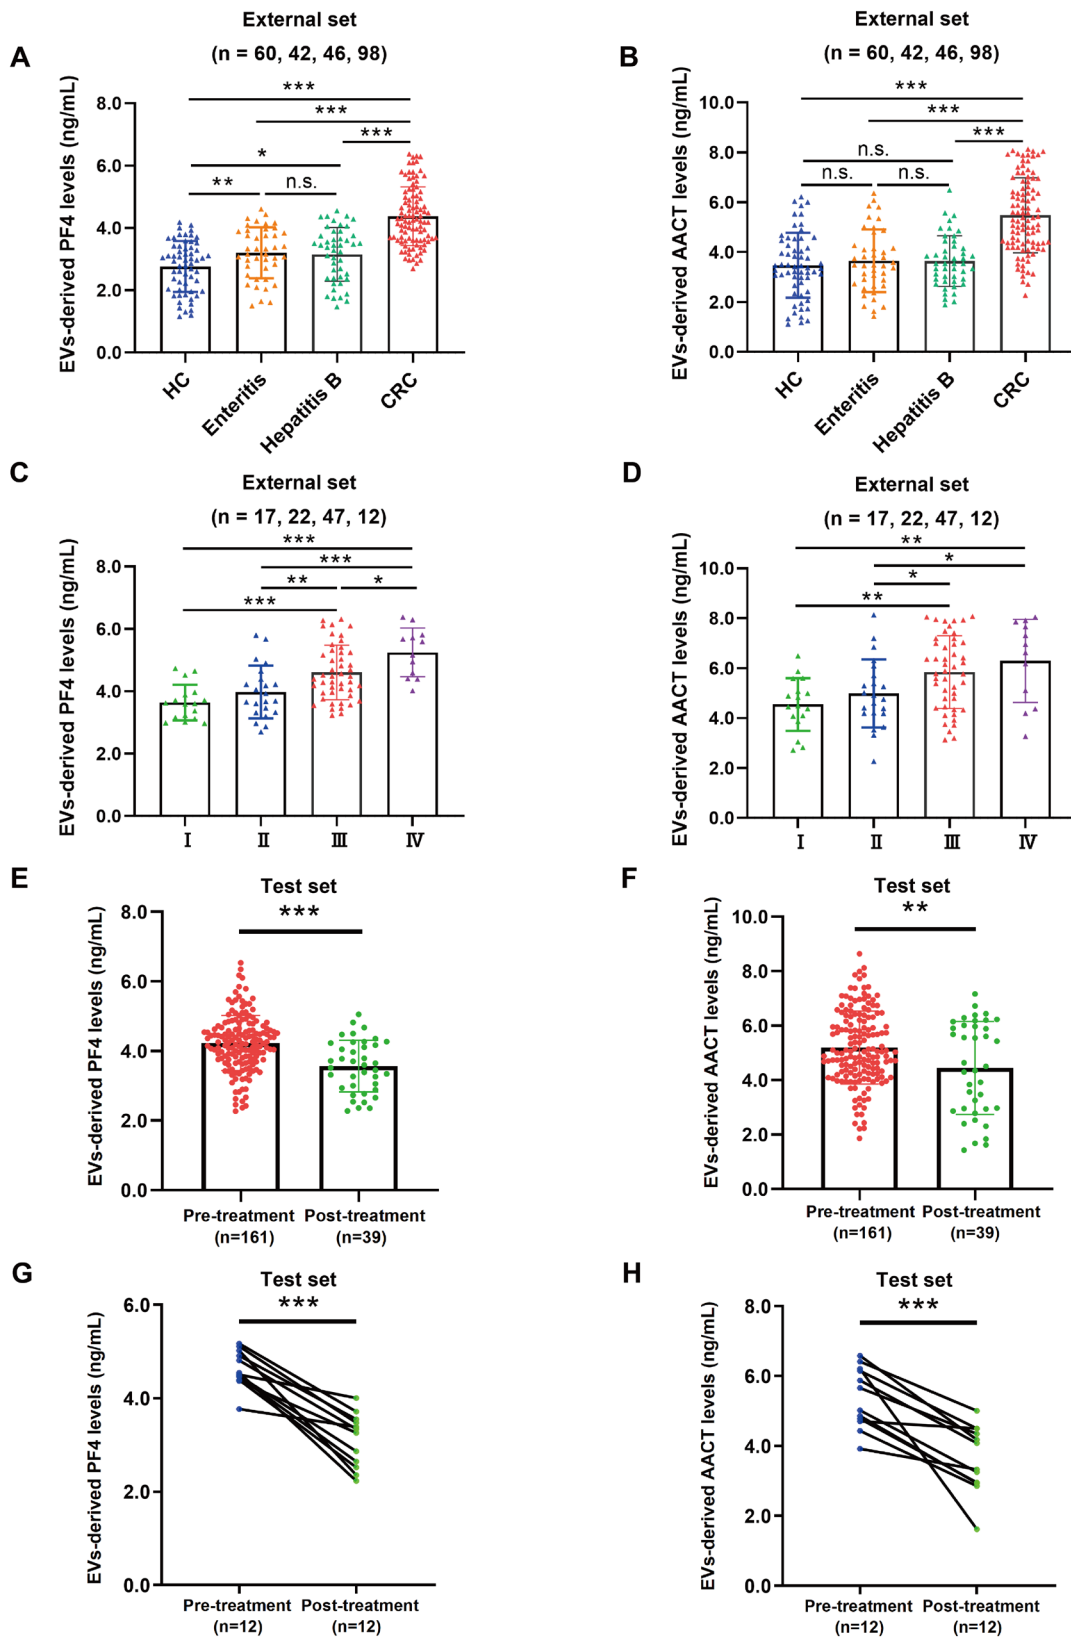

13 **Figure S2 Differential levels of PF4 and AACT derived from EVs among different**  
 14 **clinical groups.**

15 (A, B) EVs-derived PF4 (A) and AACT (B) levels detected by ELISA in HC (n = 60),  
 16 Enteritis (n = 42), Hepatitis B (n = 46), and CRC (n = 98) groups from the external set.  
 17 (C, D) The levels of EVs-derived PF4 (C) and AACT (D) at different clinical stages (I:  
 18 n = 17, II: n = 22, III: n = 47, IV: n = 12) of CRC patients in the external set. (E, F)  
 19 Comparison of EVs-derived PF4 (E) and AACT (F) levels in CRC patients with (n=39)  
 20 and without (n=161) treatment in the train set. (G, H) Comparison of EVs-derived PF4  
 21 (G) and AACT (H) levels before and after treatment in 12 CRC patients. Data are shown  
 22 as mean ± SD; n.s.: Not significance, \*  $P < 0.05$ , \*\*  $P < 0.01$ , and \*\*\*  $P < 0.001$ .  
 23

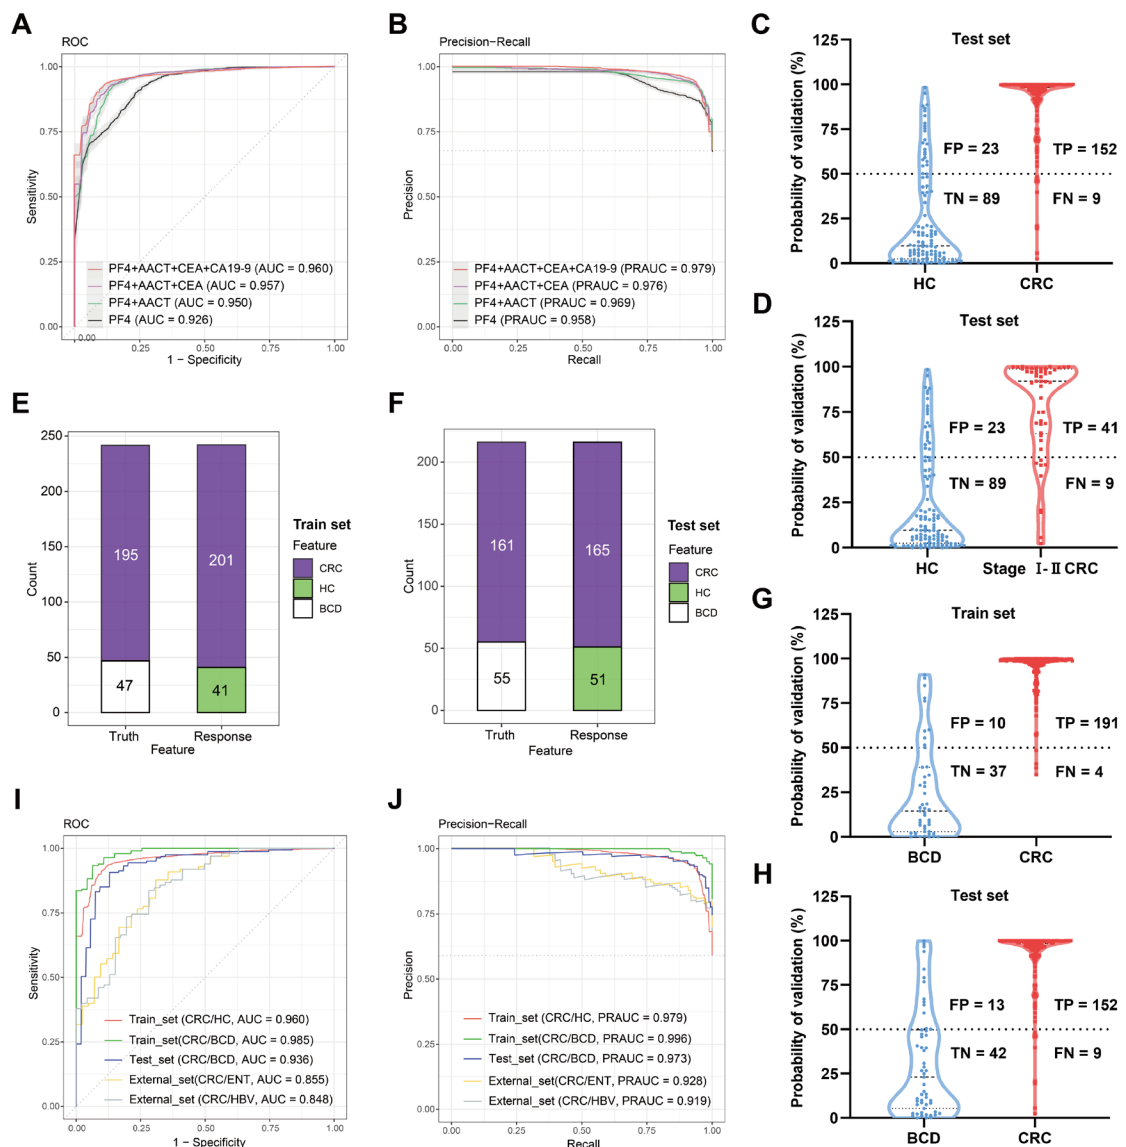

24 **Figure S3 Diagnostic performance of different combinations and the EVs-related**  
 25 **model for distinguishing CRC from BCD and inflammatory disease.**

26 (A, B) ROC (A) and PR (B) curves of the indicated ML diagnostic models based on  
 27 different combinations of 4 variables. (C) Probability of responding CRC in validating  
 28 the EVs-related model using the test set. (D) Probability of responding CRC in  
 29

30 validating the EVs-related model using stage I-II and HC samples from the test set. (E,  
 31 F) Confusion matrix displayed the prediction results for 242 train set (E) (CRC: 195  
 32 cases, BCD: 47 cases) and 216 test set (F) (CRC: 161 cases, BCD: 55 cases) through  
 33 the EVs-related diagnostic model. (G, H) Probability of responding CRC in validating  
 34 the EVs-related model using CRC and BCD samples from the train (G) and test (H)  
 35 sets. (I, J) ROC curve (I) and PR curve (J) were plotted for the EVs-related diagnostic  
 36 model using the train, test, and external sets.  
 37

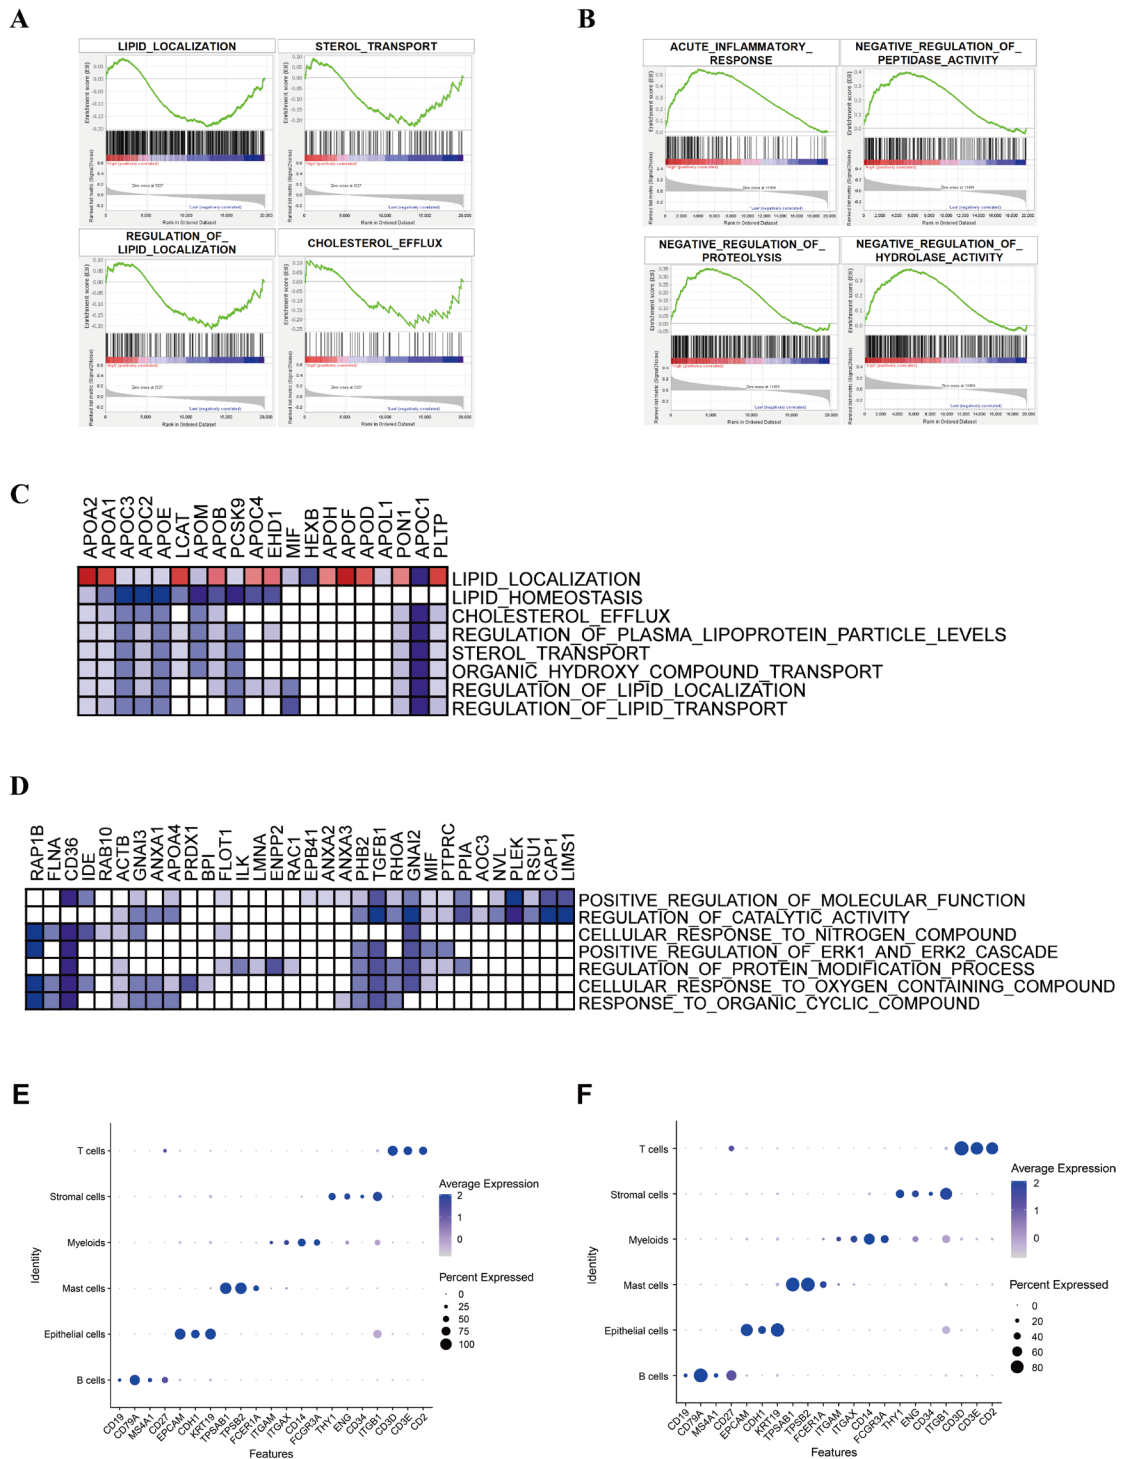

38

39 **Figure S4 Functional enrichment analysis of PF4 and AACT.**

40 (A, B) GSEA illustrated the pathways enriched in PF4-low phenotype (A) and AACT-  
 41 high phenotype (B) in TCGA CRC database. (C, D) Leading edge analysis of the  
 42 intersection proteins in the EnrichmentMap pathways network of PF4-low (C) and  
 43 AACT-low (D) phenotypes. (E, F) Dotplot of cell markers in various cell types. Dotplot  
 44 showed the expression of cell markers in various cell types from the GSE132465 dataset  
 45 (E) and the GSE132257 dataset (F).  
 46

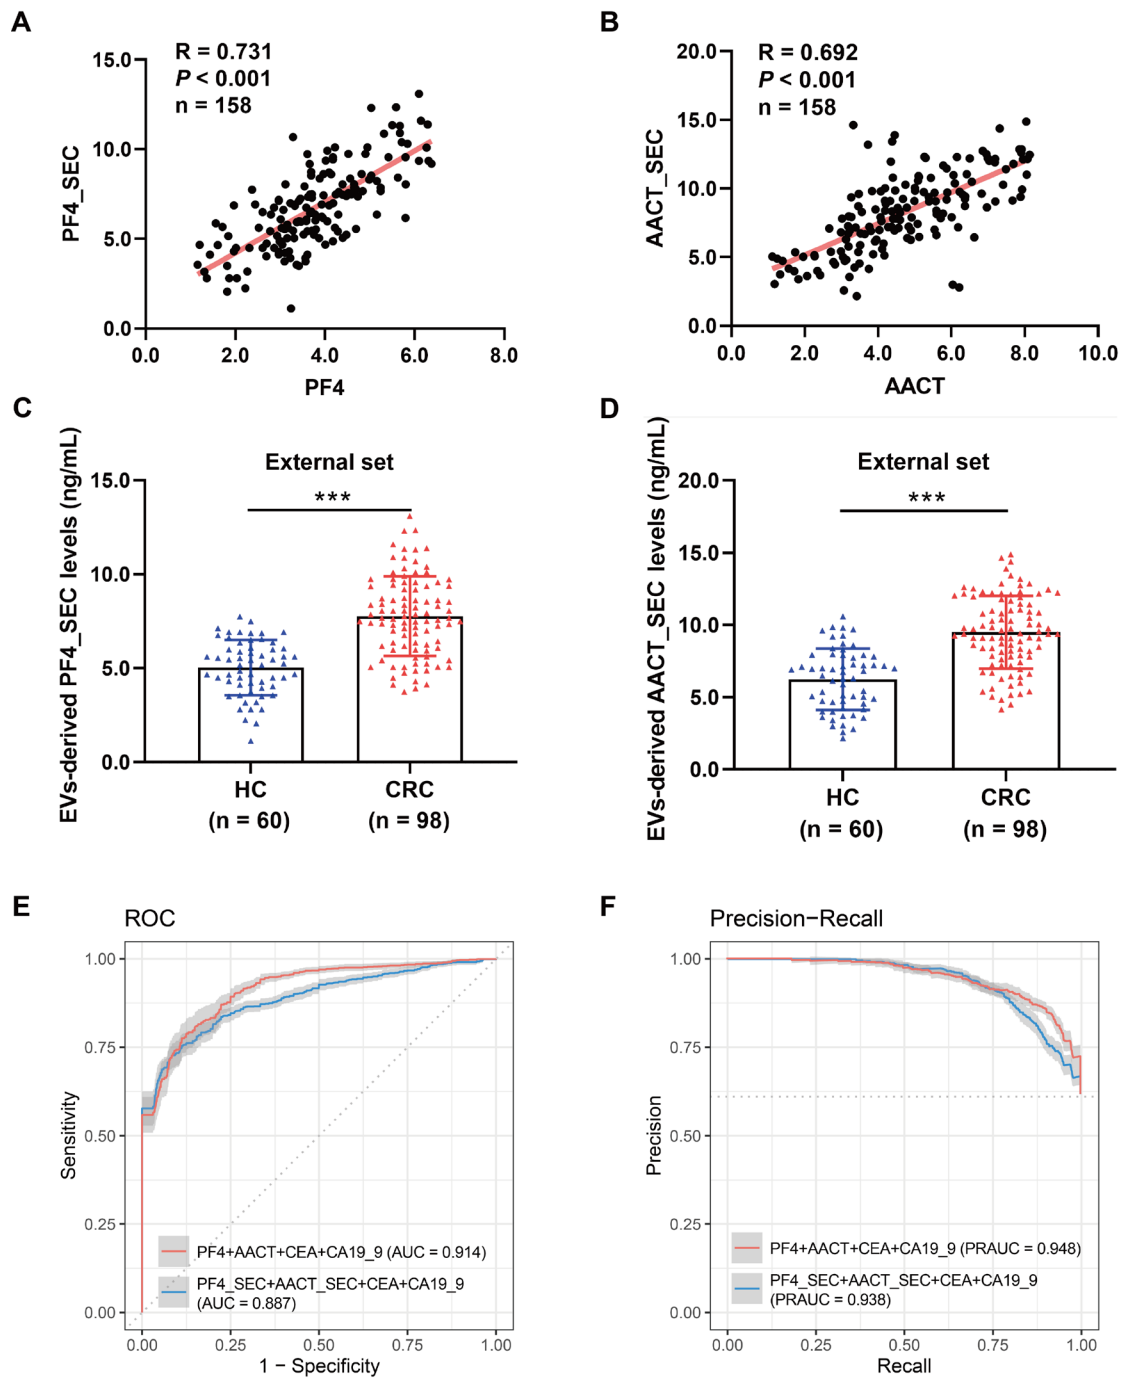

47 **Figure S5 Diagnostic assessment of PF4 and AACT extracted by size exclusion**  
 48 **chromatography for CRC.**

49 (A, B) Pearson correlation analysis of PF4 (A) and AACT (B) isolated by  
 50

51 ultracentrifugation and SEC methods. n = 158. (C, D) EVs-derived PF4 (C) and AACT  
 52 (D) isolated by size exclusion chromatography (SEC) method were detected by ELISA  
 53 in HC (n = 60) and CRC (n = 98) groups from the external set. (E) ROC (E) and PR  
 54 curve (F) of RF diagnostic models based on SEC isolated PF4, SEC isolated AACT,  
 55 CEA, and CA19\_9.  
 56

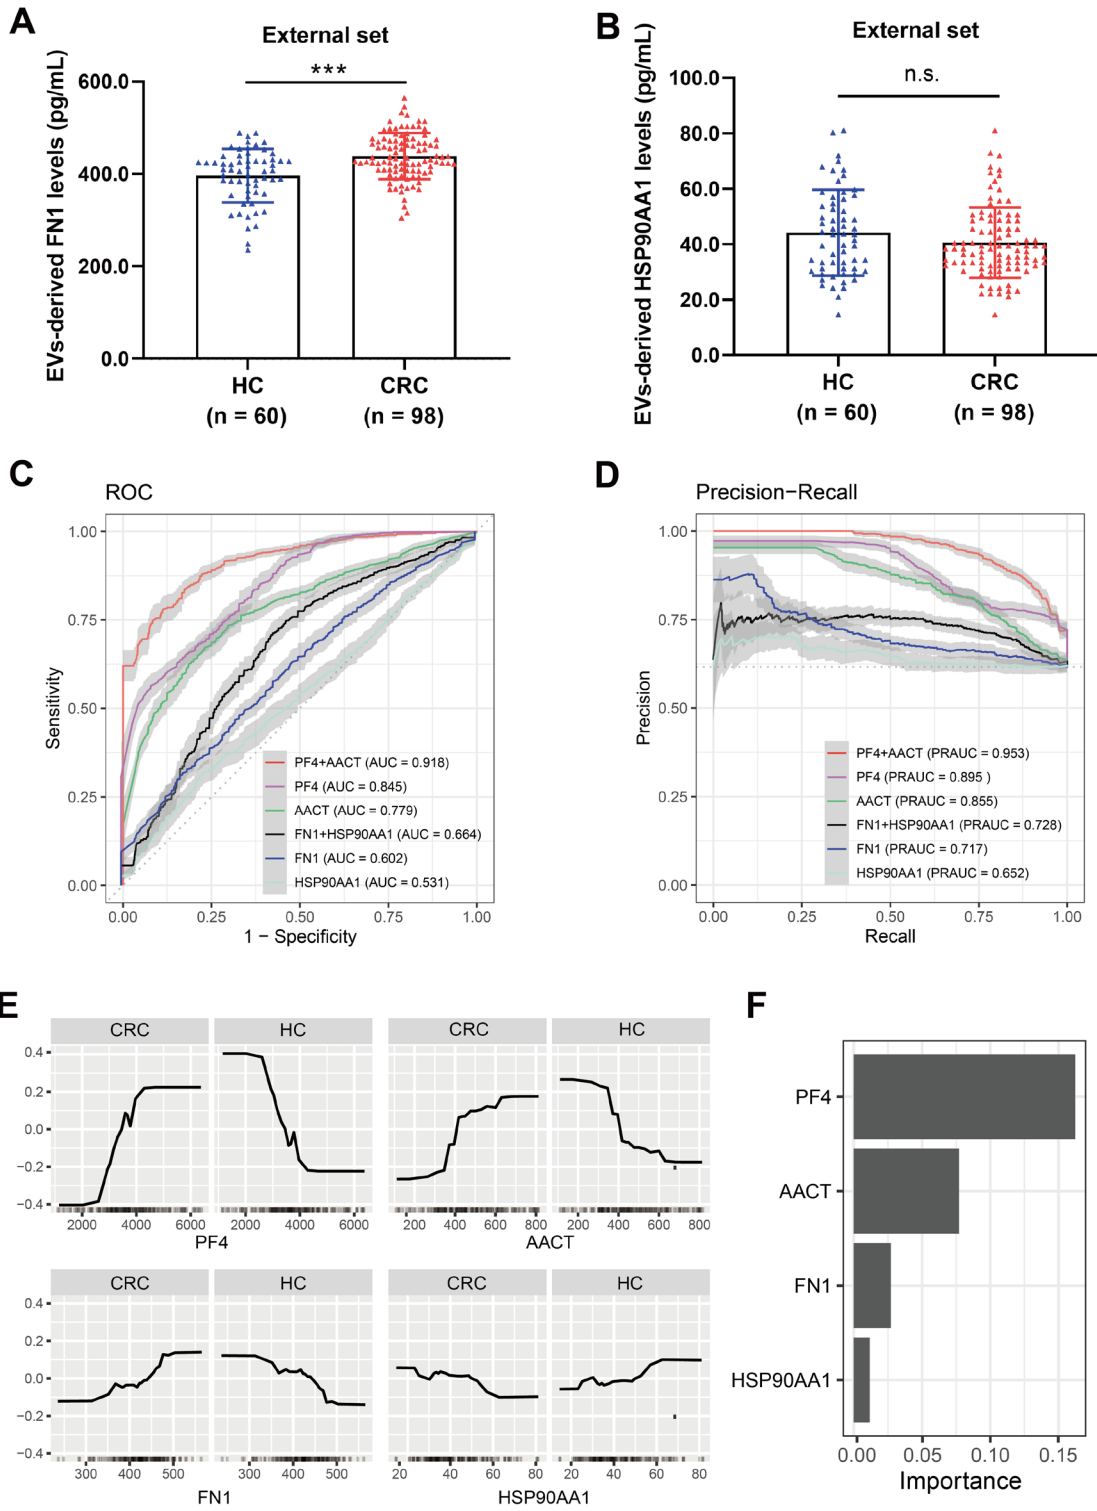

57

58 **Figure S6 Diagnostic performance of other biomarkers proposed in competitive**

59 **study.**  
60 (A, B) EVs-derived FN1 (A) and HSP90AA1 (B) levels detected by ELISA in HC (n =  
61 60) and CRC (n = 98) groups from the external set. (C, D) ROC curve (C) and PR curve  
62 (D) of RF diagnostic models based on indicated variables in the external set. (E) The  
63 ALE curve depicts the accumulated local effects of PF4, AACT, FN1, and HSP90AA1.  
64 The x-axis represents the feature values, and the y-axis represents the accumulated local  
65 effects. (F) Variable importance score plot showed the contribution of 4 variables in the  
66 RF diagnostic model.

67

68 **Table S1. Performance of different ML models.**

| ML Algorithms | AUC   | PRAUC | Classification error | Sensitivity | Specificity | Precision | Recall | Accuracy | F1 score |
|---------------|-------|-------|----------------------|-------------|-------------|-----------|--------|----------|----------|
| RF            | 0.993 | 0.997 | 0.077                | 0.979       | 0.804       | 0.918     | 0.979  | 0.923    | 0.948    |
| Rpart         | 0.895 | 0.937 | 0.083                | 0.939       | 0.852       | 0.948     | 0.939  | 0.917    | 0.943    |
| Log_reg       | 0.887 | 0.947 | 0.196                | 0.800       | 0.832       | 0.913     | 0.800  | 0.804    | 0.852    |
| Kknn          | 0.976 | 0.985 | 0.070                | 0.986       | 0.802       | 0.923     | 0.986  | 0.930    | 0.954    |
| SVM           | 0.967 | 0.986 | 0.117                | 0.966       | 0.705       | 0.880     | 0.966  | 0.883    | 0.921    |

69

70 **Table S2. Venn result of RF model variables and LASSO model variables.**

| Names                                      | Total | Elements                                   |
|--------------------------------------------|-------|--------------------------------------------|
| RF_5_variables & LASSO_λ_1se & LASSO_λ_min | 2     | PF4; AACT                                  |
| LASSO_λ_1se LASSO_λ_min                    | 6     | PGRP1; PGBM; X1433B; CALL3; S10A6; MA1A1   |
| LASSO_λ_min                                | 7     | PCSK6; HV205; IGJ; TGFBI; RETN; ATPB; FA11 |
| LASSO_λ_1se                                | 2     | AJMI; IF5A1_AND_IF5AL                      |
| RF_5_variables                             | 3     | KLD8B; CP135; KV315                        |

71

72 **Table S3. Correlation between serum EVs-derived PF4 and clinicopathological**  
73 **characteristics of CRC patients in the train set, test set, and external set.**

| Characteristics  | Train Set<br>(n=195) |                        |         | Test Set<br>(n=161) |                        |         | External Set<br>(n=98) |                        |         |
|------------------|----------------------|------------------------|---------|---------------------|------------------------|---------|------------------------|------------------------|---------|
|                  | No.of patients       | PF4 level<br>(mean±SD) | P value | No.of patients      | PF4 level<br>(mean±SD) | P value | No.of patients         | PF4 level<br>(mean±SD) | P value |
|                  | Age                  |                        |         |                     |                        |         |                        |                        |         |
| ≤60              | 103                  | 4.079±0.824            | 0.674   | 82                  | 4.269±0.855            | 0.544   | 38                     | 4.384±1.039            | 0.928   |
| >60              | 92                   | 4.127±0.784            |         | 79                  | 4.193±0.730            |         | 60                     | 4.366±0.887            |         |
| Gender           |                      |                        |         |                     |                        |         |                        |                        |         |
| Male             | 111                  | 4.105±0.783            | 0.985   | 98                  | 4.153±0.786            | 0.116   | 47                     | 4.287±0.955            | 0.382   |
| Female           | 84                   | 4.103±0.830            |         | 63                  | 4.355±0.799            |         | 51                     | 4.452±0.936            |         |
| Clinical stage   |                      |                        |         |                     |                        |         |                        |                        |         |
| I-II             | 70                   | 3.624±0.783            | <0.001  | 50                  | 3.658±0.687            | <0.001  | 39                     | 3.829±0.749            | <0.001  |
| III-IV           | 125                  | 4.373±0.747            |         | 111                 | 4.490±0.701            |         | 59                     | 4.732±0.889            |         |
| T classification |                      |                        |         |                     |                        |         |                        |                        |         |
| T1-T2            | 49                   | 3.822±0.789            | 0.003   | 32                  | 3.798±1.034            | 0.001   | 20                     | 3.826±0.775            | 0.003   |



|                  |     |             |        |     |             |        |    |             |        |
|------------------|-----|-------------|--------|-----|-------------|--------|----|-------------|--------|
| T3-T4            | 146 | 4.201±0.785 |        | 129 | 4.335±0.692 |        | 77 | 4.515±0.942 |        |
| N classification |     |             |        |     |             |        |    |             |        |
| N0               | 73  | 3.682±0.713 | <0.001 | 55  | 3.741±0.724 | <0.001 | 39 | 3.829±0.749 | <0.001 |
| N1-N3            | 122 | 4.357±0.745 |        | 106 | 4.487±0.708 |        | 58 | 4.738±0.896 |        |
| M classification |     |             |        |     |             |        |    |             |        |
| M0               | 153 | 3.975±0.703 | <0.001 | 97  | 3.931±0.696 | <0.001 | 85 | 4.254±0.907 | 0.001  |
| M1               | 42  | 4.575±0.956 |        | 64  | 4.688±0.718 |        | 13 | 5.147±0.827 |        |
| Differentiation  |     |             |        |     |             |        |    |             |        |
| Poor             | 24  | 3.956±0.828 | 0.351  | 25  | 4.561±0.657 | 0.025  | 15 | 4.615±0.954 | 0.259  |
| Moderate / Well  | 111 | 4.139±0.879 |        | 120 | 4.163±0.825 |        | 64 | 4.298±0.977 |        |
| HER2 expression  |     |             |        |     |             |        |    |             |        |
| Negative         | 88  | 4.070±0.806 | 0.459  | 64  | 4.180±0.752 | 0.768  | 36 | 4.289±1.005 | 0.725  |
| Positive         | 36  | 4.191±0.877 |        | 38  | 4.223±0.624 |        | 23 | 4.381±0.920 |        |
| BRAF status      |     |             |        |     |             |        |    |             |        |
| Wild             | 113 | 4.108±0.844 | 0.590  | 43  | 4.386±0.585 | 0.016  | 53 | 4.362±0.962 | NA     |
| Mutation         | 6   | 3.918±0.733 |        | 4   | 5.148±0.525 |        | 0  | NA          |        |
| MSS/MSI status   |     |             |        |     |             |        |    |             |        |
| MSS              | 124 | 4.173±0.866 | 0.114  | 107 | 4.207±0.736 | 0.390  | 61 | 4.282±1.044 | 0.397  |
| MSI              | 11  | 3.749±0.546 |        | 9   | 3.98±0.85   |        | 7  | 4.626±0.618 |        |
| CEA (ng/mL)      |     |             |        |     |             |        |    |             |        |
| <5               | 129 | 4.031±0.761 | 0.073  | 90  | 4.056±0.752 | 0.002  | 65 | 4.256±0.909 | 0.087  |
| ≥5               | 66  | 4.248±0.863 |        | 71  | 4.446±0.797 |        | 33 | 4.602±0.981 |        |
| CA19-9 (ng/mL)   |     |             |        |     |             |        |    |             |        |
| <35              | 153 | 4.064±0.779 | 0.184  | 112 | 4.093±0.726 | 0.001  | 82 | 4.353±0.942 | 0.638  |
| ≥35              | 42  | 4.250±0.873 |        | 49  | 4.558±0.866 |        | 16 | 4.475±0.977 |        |

74

75

76

**Table S4. Correlation between serum EVs-derived AACT and clinicopathological characteristics of CRC patients in the train set, test set, and external set.**

| Characteristics | Train Set<br>(n=195) |                      |         | Test Set<br>(n=161) |                      |         | External Set<br>(n=98) |                      |         |
|-----------------|----------------------|----------------------|---------|---------------------|----------------------|---------|------------------------|----------------------|---------|
|                 | No.of patients       | AACT level (mean±SD) | P value | No.of patients      | AACT level (mean±SD) | P value | No.of patients         | AACT level (mean±SD) | P value |
| Age             |                      |                      |         |                     |                      |         |                        |                      |         |
| ≤60             | 103                  | 5.204±1.422          | 0.306   | 82                  | 5.172±1.426          | 0.807   | 38                     | 5.703±1.528          | 0.235   |
| >60             | 92                   | 5.409±1.357          |         | 79                  | 5.224±1.253          |         | 60                     | 5.331±1.481          |         |
| Gender,         |                      |                      |         |                     |                      |         |                        |                      |         |
| Male            | 111                  | 5.303±1.414          | 0.971   | 98                  | 5.157±1.411          | 0.638   | 47                     | 5.325±1.554          | 0.345   |
| Female          | 84                   | 5.297±1.370          |         | 63                  | 5.260±1.229          |         | 51                     | 5.614±1.456          |         |
| Clinical stage  |                      |                      |         |                     |                      |         |                        |                      |         |

|                  |     |             |       |     |             |       |    |             |        |
|------------------|-----|-------------|-------|-----|-------------|-------|----|-------------|--------|
| I-II             | 70  | 4.923±1.393 | 0.004 | 50  | 4.681±1.287 | 0.001 | 39 | 4.791±1.244 | <0.001 |
| III-IV           | 125 | 5.512±1.351 |       | 111 | 5.430±1.303 |       | 59 | 5.928±1.496 |        |
| T classification |     |             |       |     |             |       |    |             |        |
| T1-T2            | 49  | 5.013±1.331 | 0.095 | 32  | 4.777±1.293 | 0.051 | 20 | 4.991±1.466 | 0.122  |
| T3-T4            | 146 | 5.397±1.403 |       | 129 | 5.298±1.336 |       | 77 | 5.568±1.479 |        |
| N classification |     |             |       |     |             |       |    |             |        |
| N0               | 73  | 4.910±1.400 | 0.002 | 55  | 4.733±1.264 | 0.001 | 39 | 4.791±1.244 | <0.001 |
| N1-N3            | 122 | 5.534±1.339 |       | 106 | 5.439±1.320 |       | 58 | 5.892±1.483 |        |
| M classification |     |             |       |     |             |       |    |             |        |
| M0               | 153 | 5.159±1.347 | 0.006 | 97  | 4.983±1.389 | 0.012 | 85 | 5.373±1.459 | 0.084  |
| M1               | 42  | 5.816±1.446 |       | 64  | 5.523±1.201 |       | 13 | 6.147±1.669 |        |
| Differentiation  |     |             |       |     |             |       |    |             |        |
| Poor             | 24  | 5.704±1.630 | 0.137 | 25  | 5.277±1.351 | 0.793 | 15 | 5.479±1.500 | 0.880  |
| Moderate / Well  | 111 | 5.236±1.333 |       | 120 | 5.200±1.318 |       | 64 | 5.546±1.542 |        |
| HER2 expression  |     |             |       |     |             |       |    |             |        |
| Negative         | 88  | 5.443±1.407 | 0.259 | 64  | 5.241±1.299 | 0.377 | 36 | 5.684±1.662 | 0.393  |
| Positive         | 36  | 5.120±1.515 |       | 38  | 4.997±1.407 |       | 23 | 5.331±1.298 |        |
| BRAF status      |     |             |       |     |             |       |    |             |        |
| Wild             | 113 | 5.400±1.463 | 0.241 | 43  | 5.282±1.104 | 0.849 | 53 | 5.645±1.583 | NA     |
| Mutation         | 6   | 4.678±1.449 |       | 4   | 5.172±1.020 |       | 0  | NA          |        |
| MSS/MSI status   |     |             |       |     |             |       |    |             |        |
| MSS              | 124 | 5.384±1.387 | 0.818 | 107 | 5.025±1.258 | 0.711 | 61 | 5.477±1.535 | 0.838  |
| MSI              | 11  | 5.283±1.496 |       | 9   | 5.190±1.286 |       | 7  | 5.604±1.731 |        |
| CEA (ng/mL)      |     |             |       |     |             |       |    |             |        |
| <5               | 129 | 5.178±1.393 | 0.086 | 90  | 5.056±1.346 | 0.166 | 65 | 5.412±1.555 | 0.561  |
| ≥5               | 66  | 5.540±1.369 |       | 71  | 5.352±1.312 |       | 33 | 5.600±1.408 |        |
| CA19-9 (ng/mL)   |     |             |       |     |             |       |    |             |        |
| <35              | 153 | 5.220±1.420 | 0.123 | 112 | 5.121±1.401 | 0.193 | 82 | 5.417±1.429 | 0.388  |
| ≥35              | 42  | 5.595±1.258 |       | 49  | 5.421±1.144 |       | 16 | 5.774±1.859 |        |

77

78

**Table S5. Diagnostic performance of RF models based on different combinations.**

| Combinations       | AUC   | PRAUC | Classification error | Sensitivity | Specificity | Precision | Recall | Accuracy | F1 score |
|--------------------|-------|-------|----------------------|-------------|-------------|-----------|--------|----------|----------|
| PF4                | 0.926 | 0.958 | 0.146                | 0.894       | 0.771       | 0.891     | 0.894  | 0.854    | 0.893    |
| PF4+AACT           | 0.950 | 0.969 | 0.089                | 0.945       | 0.843       | 0.924     | 0.945  | 0.911    | 0.935    |
| PF4+AACT+CEA       | 0.957 | 0.976 | 0.092                | 0.937       | 0.849       | 0.927     | 0.937  | 0.908    | 0.932    |
| PF4+AACT+CEA+CA199 | 0.960 | 0.979 | 0.084                | 0.942       | 0.867       | 0.935     | 0.942  | 0.916    | 0.938    |

79

80

**Table S6. Diagnostic performances of train set, test set, and external set through the EVs-related model.**

81

| Models                            | AUC   | PRAUC | Classification error | Sensitivity | Specificity | Precision | Recall | Accuracy | F1 score |
|-----------------------------------|-------|-------|----------------------|-------------|-------------|-----------|--------|----------|----------|
| The EVs-related model             | 0.960 | 0.979 | 0.084                | 0.942       | 0.867       | 0.935     | 0.942  | 0.916    | 0.938    |
| Test set (CRC vs HC)              | 0.963 | 0.975 | 0.117                | 0.944       | 0.795       | 0.869     | 0.944  | 0.883    | 0.905    |
| Test set (Stage I-II CRC vs HC)   | 0.905 | 0.841 | 0.198                | 0.820       | 0.795       | 0.641     | 0.820  | 0.802    | 0.719    |
| Train set (CRC vs BCD)            | 0.985 | 0.996 | 0.058                | 0.979       | 0.787       | 0.950     | 0.979  | 0.942    | 0.965    |
| Test set (CRC vs BCD)             | 0.936 | 0.973 | 0.102                | 0.944       | 0.764       | 0.921     | 0.944  | 0.898    | 0.933    |
| External set (CRC vs HC)          | 0.895 | 0.921 | 0.190                | 0.959       | 0.567       | 0.783     | 0.959  | 0.810    | 0.862    |
| External set (CRC vs Enteritis)   | 0.855 | 0.928 | 0.186                | 0.959       | 0.476       | 0.810     | 0.959  | 0.814    | 0.879    |
| External set (CRC vs Hepatitis B) | 0.848 | 0.919 | 0.194                | 0.959       | 0.478       | 0.797     | 0.959  | 0.806    | 0.870    |

82
